# Supplementary material for: "PolyMin": software for identification of the minimum number of polymorphisms required for haplotype and genotype differentiation
Source: Springer Nature journal article supplement (doi:10.1186/1471-2105-10-176), 2009-06-10

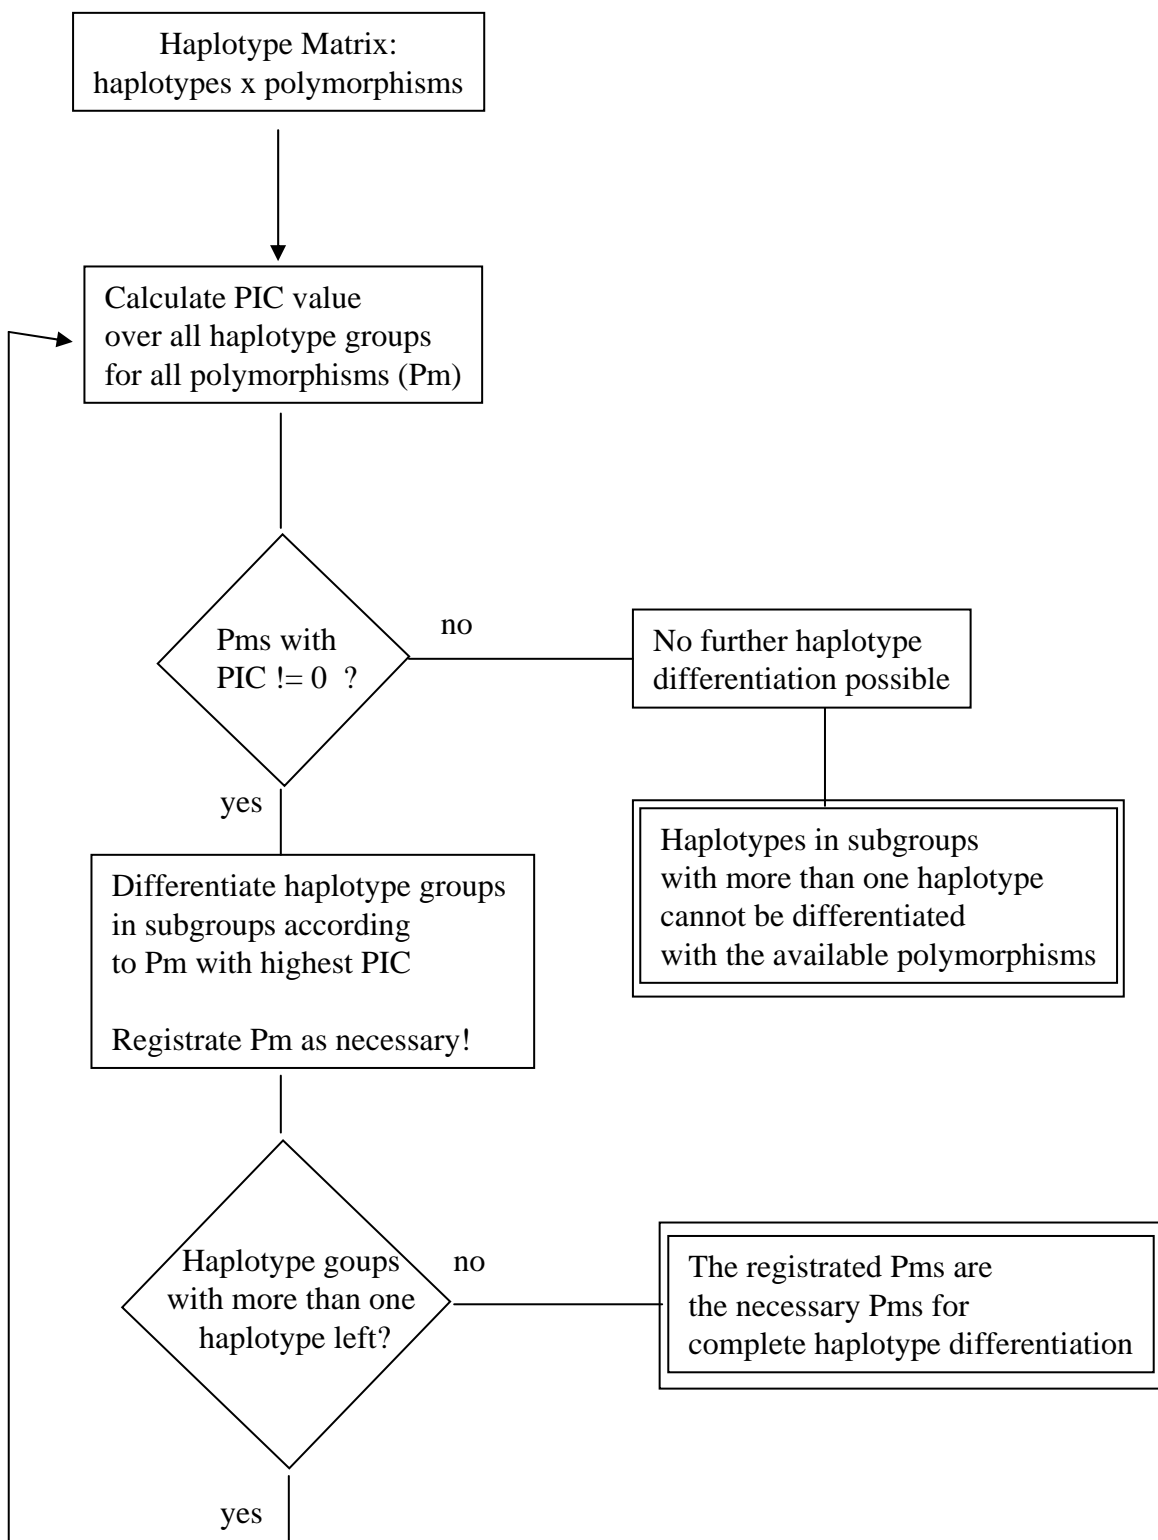

Supplement: 12859_2009_2906_MOESM1_ESM.pdf [file 12859_2009_2906_MOESM1_ESM.pdf]
