# Supplementary material for: "PolyMin": software for identification of the minimum number of polymorphisms required for haplotype and genotype differentiation
Source: Springer Nature journal article supplement (doi:10.1186/1471-2105-10-176), 2009-06-10
Supplement: 12859_2009_2906_MOESM2_ESM.pdf [file 12859_2009_2906_MOESM2_ESM.pdf]

| Steps of analysis         | PolyMin                                                                                                                                                                                                | BEST                                                        | SNPtagger                                                   |
|---------------------------|--------------------------------------------------------------------------------------------------------------------------------------------------------------------------------------------------------|-------------------------------------------------------------|-------------------------------------------------------------|
| Sequence data             | <i>INPUT</i>                                                                                                                                                                                           |                                                             |                                                             |
| Multiple alignment        | Multiple alignment                                                                                                                                                                                     |                                                             |                                                             |
| Allele differentiation    |                                                                                                                                                                                                        | <i>INPUT</i>                                                | <i>INPUT</i>                                                |
| Haplotype                 |                                                                                                                                                                                                        | Haplotype                                                   | Haplotype                                                   |
| Haplotype differentiation |                                                                                                                                                                                                        |                                                             | <i>OUTPUT</i>                                               |
| Genotype differentiation  |                                                                                                                                                                                                        |                                                             |                                                             |
| <b>Results</b>            | <p>Frequency of different alleles</p> <p>Haplotype</p> <p>Minimal set of polymorphisms for haplotype differentiation</p> <p>Minimal set of polymorphisms for genotype differentiation in offspring</p> | Minimal sets of polymorphisms for haplotype differentiation | Minimal sets of polymorphisms for haplotype differentiation |
